# Supplementary material for: Effects of Physical Exercise on Adiponectin, Leptin, and Inflammatory Markers in Childhood Obesity: Systematic Review and Meta-Analysis
Source: PubMed Central journal article supplement — Child Obes. 2018 Jun 1;14(4):207–17. doi: 10.1089/chi.2017.0269 (PMC5994661; doi:10.1089/chi.2017.0269), 2018-06-01
Supplement: Supp_Fig1.pdf [file Supp_Fig1.pdf]

## Supplementary Data

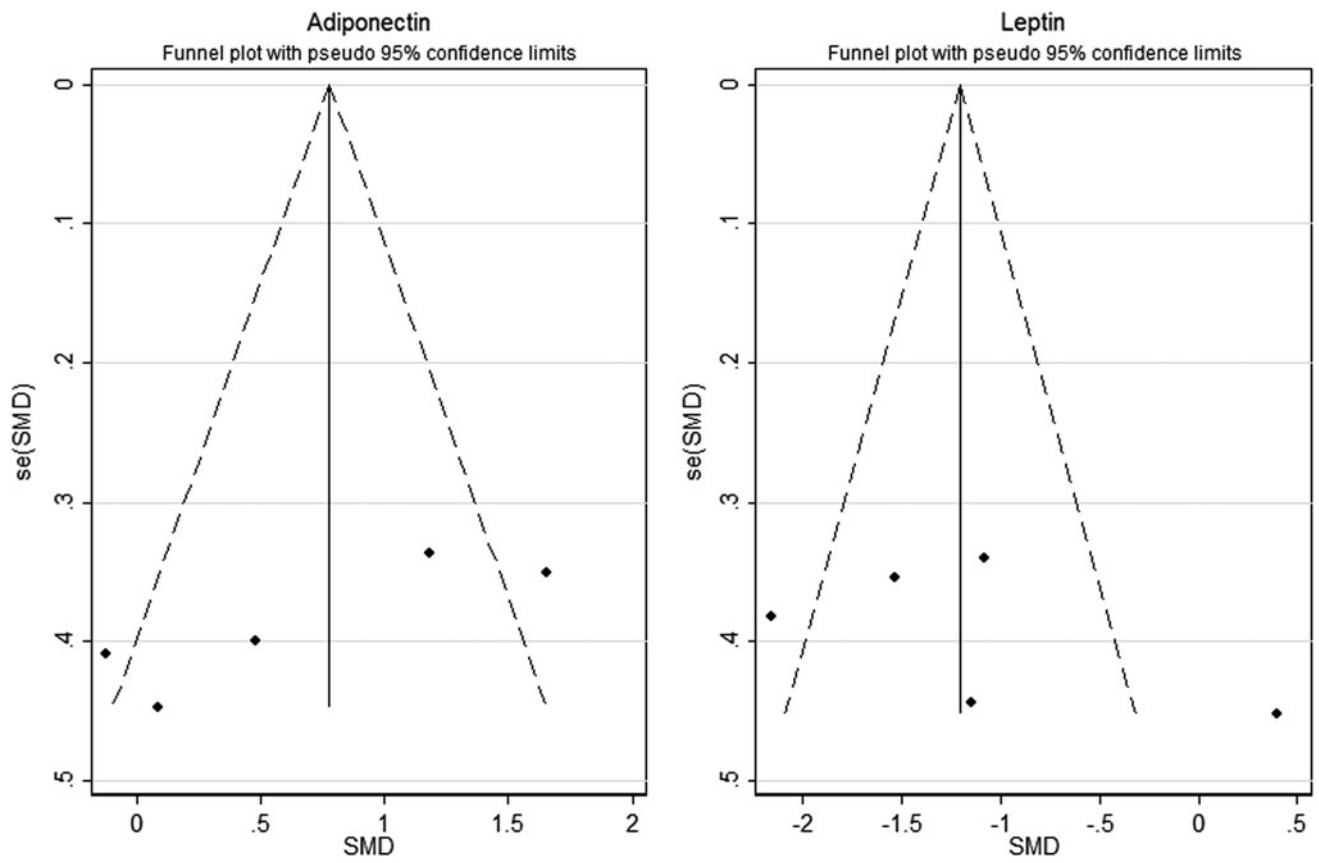

Supplementary Figure S1. The funnel plots of standard error of SMD against SMD for adiponectin and leptin studies to assess for publication bias. SMD, standardized mean difference.
