# Supplementary material for: Effects of Physical Exercise on Adiponectin, Leptin, and Inflammatory Markers in Childhood Obesity: Systematic Review and Meta-Analysis
Source: PubMed Central journal article supplement — Child Obes. 2018 Jun 1;14(4):207–17. doi: 10.1089/chi.2017.0269 (PMC5994661; doi:10.1089/chi.2017.0269), 2018-06-01
Supplement: Supp_Table2.pdf [file Supp_Table2.pdf]

## Supplementary Table S2. PubMed Search Strategy

|      |                                  |
|------|----------------------------------|
| # 1  | “pediatric obesity”[MeSH Terms]  |
| # 2  | “pediatric obesity”[All Fields]  |
| # 3  | #1 OR #2                         |
| # 4  | “childhood obesity”[All Fields]  |
| # 5  | “obesity”[MESH Terms]            |
| # 6  | “obesity”[All Fields]            |
| # 7  | #5 OR #6                         |
| # 8  | “child”[MESH Terms]              |
| # 9  | “child”[All Fields]              |
| # 10 | “children”[All Fields]           |
| #11  | #8 OR #9 OR #10                  |
| #12  | #7 AND #11                       |
| #13  | #3 OR #4 OR #12                  |
| # 14 | “inflammation”[MeSH Terms]       |
| # 15 | “inflammation”[All Fields]       |
| # 16 | #14 OR #15                       |
| # 17 | “inflammatory” [All Fields]      |
| # 18 | #16 OR #17                       |
| # 19 | “biomarkers”[MeSH Terms]         |
| # 20 | “biomarkers”[All Fields]         |
| # 21 | “markers”[All Fields]            |
| # 22 | “marker” [All Fields]            |
| # 23 | #19 OR #20 OR #21 OR #22         |
| # 24 | #18 AND #23                      |
| # 25 | “adiponectin”[MeSH Terms]        |
| # 26 | “adiponectin”[All Fields]        |
| # 27 | #25 OR #26                       |
| # 28 | “leptin”[MeSH Terms]             |
| # 29 | “leptin”[All Fields]             |
| # 30 | #28 OR #29                       |
| # 31 | “interleukin-6”[MeSH Terms]      |
| # 32 | “interleukin-6”[All Fields]      |
| # 33 | “interleukin 6”[All Fields]      |
| # 34 | “IL 6”[All Fields]               |
| # 35 | #31 OR #32 OR #33 OR #34         |
| # 36 | “c-reactive protein”[MeSH Terms] |
| # 37 | “c-reactive protein”[All Fields] |
| # 38 | “c reactive protein”[All Fields] |
| # 39 | “crp”[All Fields]                |
| # 40 | #36 OR #37 OR #38 OR #39         |

continued on page 5

## Supplementary Table S2. PubMed Search Strategy continued

|      |                                           |
|------|-------------------------------------------|
| # 41 | “tumor necrosis factor-alpha”[MeSH Terms] |
| # 42 | “tumor necrosis factor-alpha”[All Fields] |
| # 43 | “tumor necrosis factor alpha”[All Fields] |
| # 44 | “tumor necrosis factor alpha”[All Fields] |
| # 45 | “tnf alpha”[All Fields]                   |
| # 46 | #41 OR #42 OR #43 OR #44 OR #45           |
| # 47 | #24 OR #27 OR #30 OR #35 OR #40 OR #46    |
| # 48 | “exercise”[MeSH Terms]                    |
| # 49 | “exercise”[All Fields]                    |
| # 50 | #48 OR #49                                |
| # 51 | “sports”[MeSH Terms]                      |
| # 52 | “sports”[All Fields]                      |
| # 53 | “sport”[All Fields]                       |
| # 54 | #51 OR #52 OR #53                         |
| # 55 | “physical exercise”[All Fields]           |
| # 56 | “physical activity”[All Fields]           |
| # 57 | #50 OR #54 OR #55 OR #56                  |
| # 58 | #13 AND #47 AND #57                       |
